# Supplementary material
Source: PubMed Central journal article supplement (PMC4009381)

Supplementary Figure S1. Neighbor-joining tree based on JTT + gamma distance ( $\alpha = 3.99$ ). Numbers on branches are confidence levels of the interior branch test; only values  $\geq 95\%$  are shown.

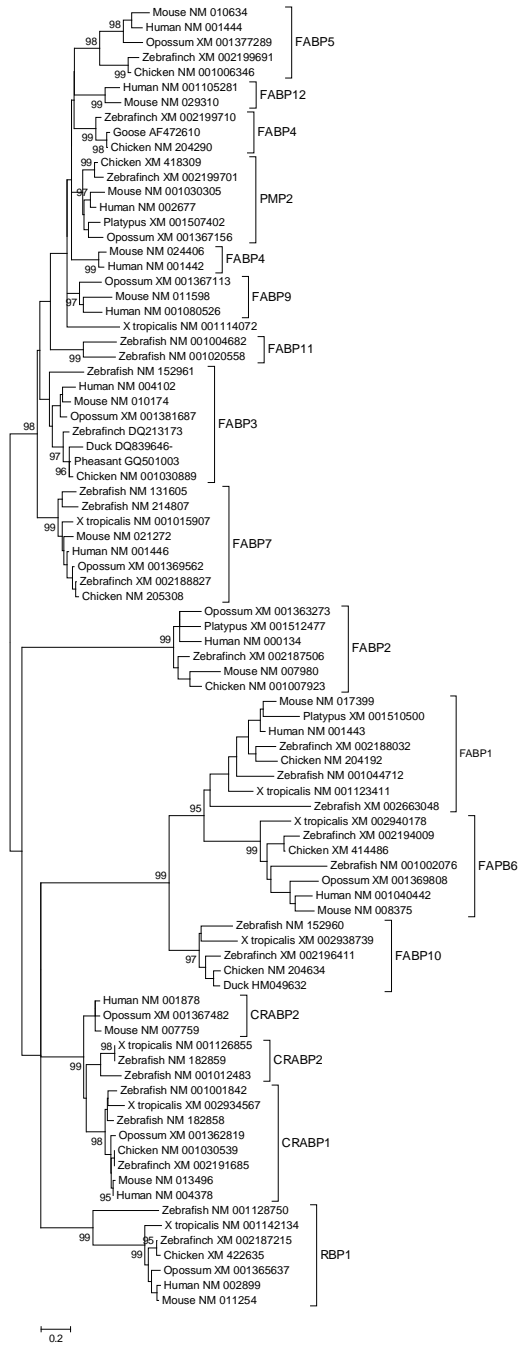

Supplement: NIHMS329736-supplement-01.pdf [file NIHMS329736-supplement-01.pdf]
